# Supplementary material for: Nootkatone Is an Effective Repellent against Aedes aegypti and Aedes albopictus
Source: MDPI journal article supplement (doi:10.3390/insects12050386), 2021-04-27
Supplement: s1 [file s1]

**Table S1.** Nootkatone (NK) bottle preparation. Amounts of 1% NK solution and 100% acetone needed to make the corresponding solution and bottle concentrations for the bottle assays.

| NK Concentration (in Solution) | NK Concentration (in Bottle W/O Acetone) | Amount of 100% Acetone | Amount of 1% NK Solution |
|--------------------------------|------------------------------------------|------------------------|--------------------------|
| 0%                             | 0 mg                                     | 1000 $\mu$ L           | 0 $\mu$ L                |
| 0.10%                          | 1 mg                                     | 900 $\mu$ L            | 100 $\mu$ L              |
| 0.25%                          | 2.5 mg                                   | 750 $\mu$ L            | 250 $\mu$ L              |
| 0.5%                           | 5 mg                                     | 500 $\mu$ L            | 500 $\mu$ L              |
| 1%                             | 10 mg                                    | 0 $\mu$ L              | 1000 $\mu$ L             |

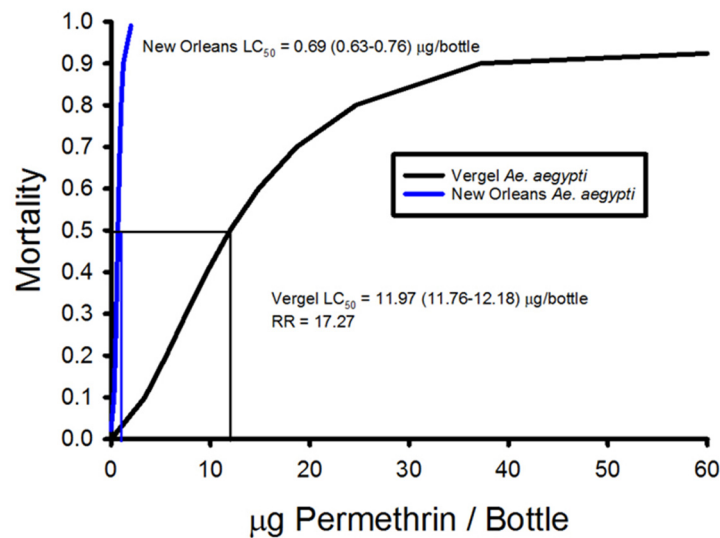

**Figure S1.**  $LC_{50}$  and linear mortality regressions of Vergel and New Orleans *A. aegypti*. when exposed to permethrin were calculated in R 3.3.1.  $LC_{50}$ s are denoted by vertical lines and are color coordinated with the respective strain, with  $LC_{50}$  values and CIs noted in the graph. Mortality is proportion of total mosquitoes that died at a given concentration of permethrin. Note that the scale is larger than the other graphs to accommodate for the large concentration needed to achieve nearly 100% mortality for the Vergel strain.

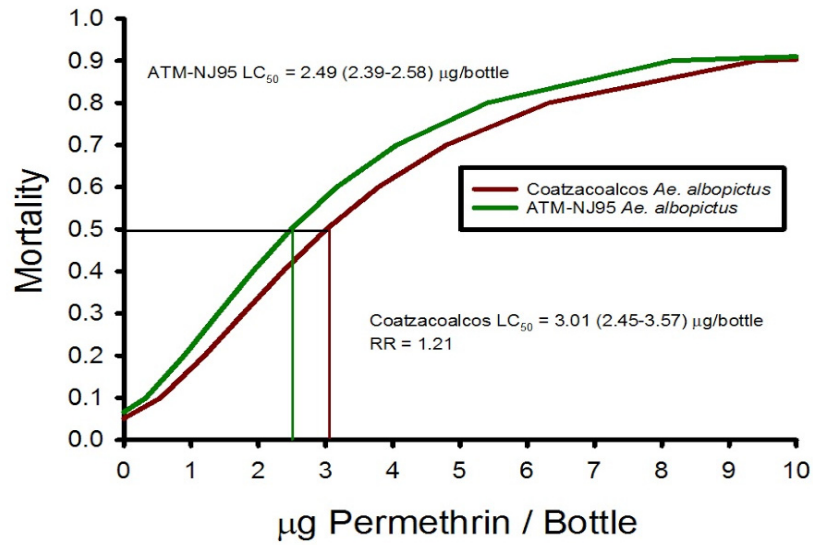

**Figure S2.**  $LC_{50}$ s and linear regressions of Coatzacoalcos and ATM-NJ95 *A. albopictus* when exposed to permethrin were calculated in R 3.3.1.  $LC_{50}$ s are denoted by vertical lines and are color coordinated with the respective strain, with  $LC_{50}$  values and CIs noted in the graph. Mortality is proportion of total mosquitoes that died at a given concentration of permethrin. Our results indicated that Coatzacoalcos was not actually more resistant to permethrin compared to the susceptible control strain, ATM-NJ95, as seen by the overlapping CIs.

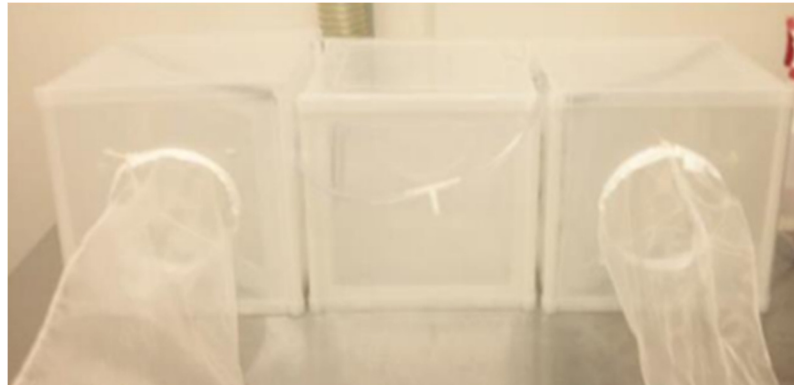

**Figure S3.** RIBB apparatus. Tester arms go through the sleeves, the tester breathes through the bifurcated tube connected to both side chambers, and mosquitoes begin each experiment in the middle chamber.
